# Supplementary material for: Upregulation of PD-L1 predicts poor prognosis and is associated with miR-191-5p dysregulation in colon adenocarcinoma
Source: PubMed Central journal article supplement — Int J Immunopathol Pharmacol. 2018 Jul 26;32:2058738418790318. doi: 10.1177/2058738418790318 (PMC6073840; doi:10.1177/2058738418790318), 2018-07-26
Supplement: IJI790318__Supplementary_REV1.pdf [file IJI790318__Supplementary_REV1.pdf]

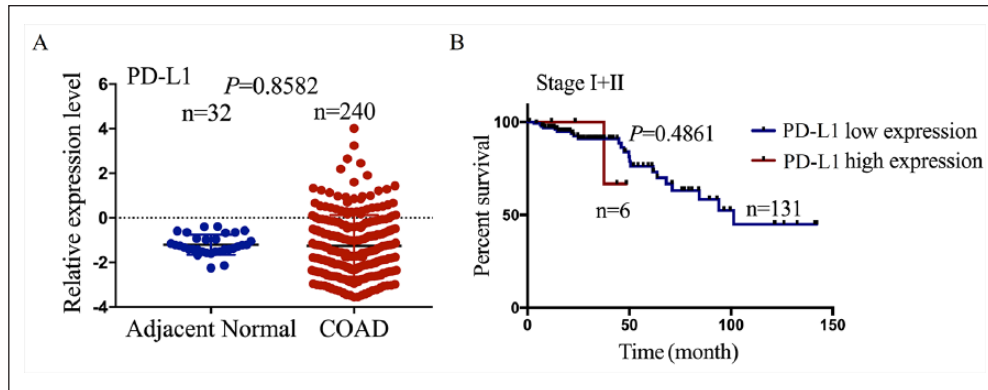

**Figure S1.** The expression of PD-L1 in patients with COAD and its correlation with overall survival **(A)** Differentially expressed level of PD-L1 in unpair-matched COAD tumor tissues and adjacent normal tissue. **(B)** Kaplan-Meier plotter analysis of the correlation of PD-L1 high or low expression with the overall survival in COAD patients with stage I+II.

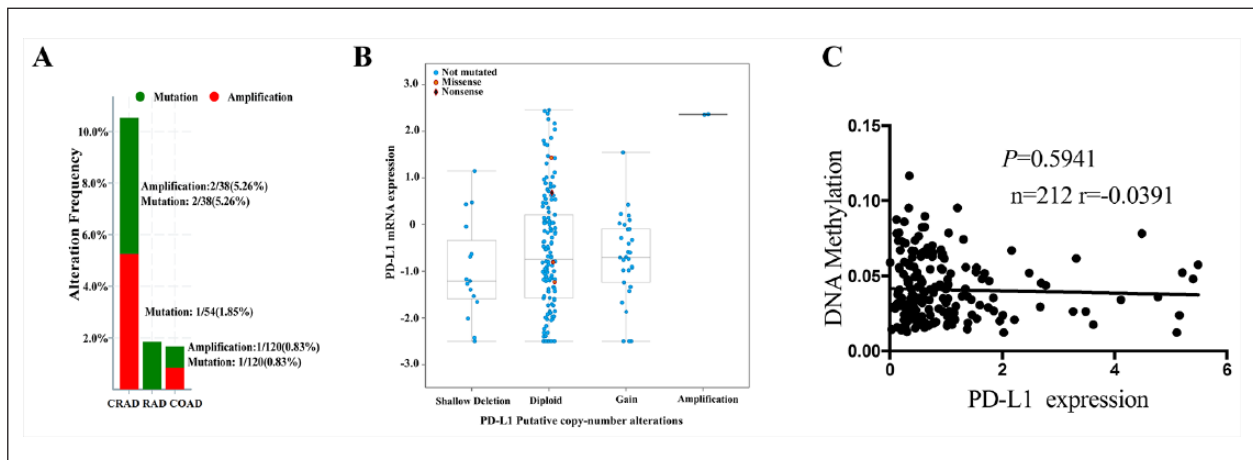

**Figure S2.** The genetic alteration frequency and the methylation levels of PD-L1 in CRC patients. **(A)** The genetic alteration frequency of PD-L1 amplification, and mutation in different pathological subtypes of CRC patients. CRAD: colorectal adenocarcinoma RAD: rectal adenocarcinoma COAD: colon adenocarcinoma **(B)** The correlation of PD-L1 gene expression with its putative copy number alterations in CRC samples. **(C)** The correlation of PD-L1 gene expression with its methylation level in CRC samples.

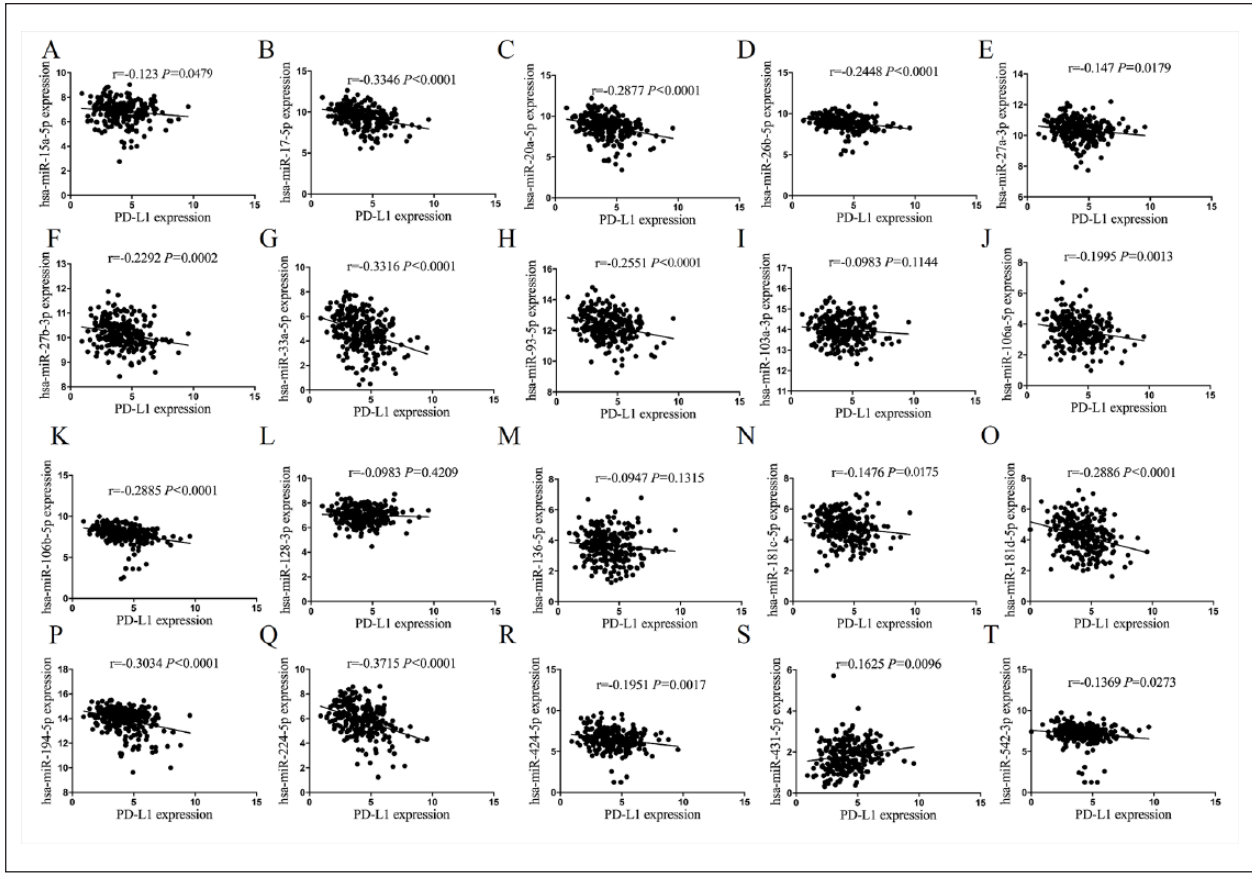

**Figure S3. (A~T)** Pearson correlation analysis of the correlation of PD-L1 expression with these 20 upregulated miRNAs in COAD samples.

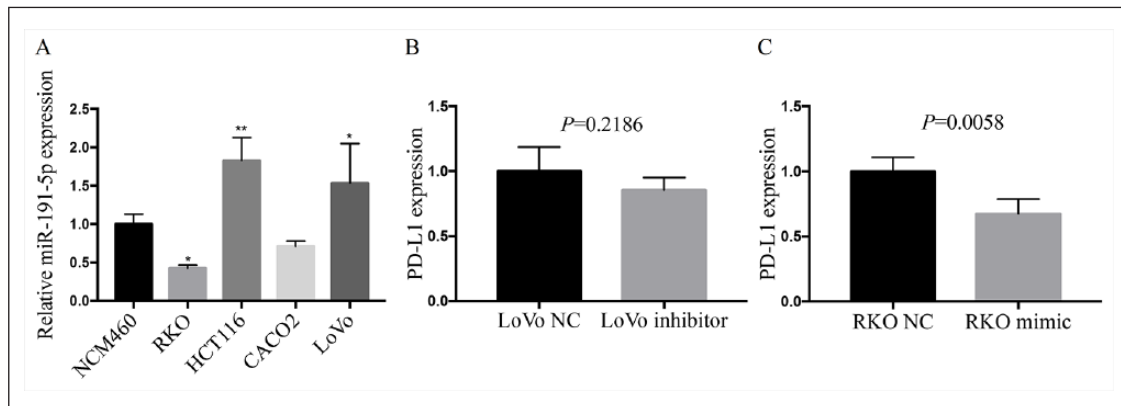

**Figure S4.** RT-PCR analysis of effect of miR-191-5p on PD-L1 in colon cancer lines. **(A)** RT-PCR analysis of the expression level of miR-191-5p in colon cell lines and NCM460 cells. **(B and C)** RT-PCR analysis of the expression levels of miR-191-5p and PD-L1 after the transfection with miR-191-5p inhibitor in LoVo cells or miR-191-5p mimic in RKO cells. \*\*  $P < 0.001$ , \*  $P < 0.05$ .

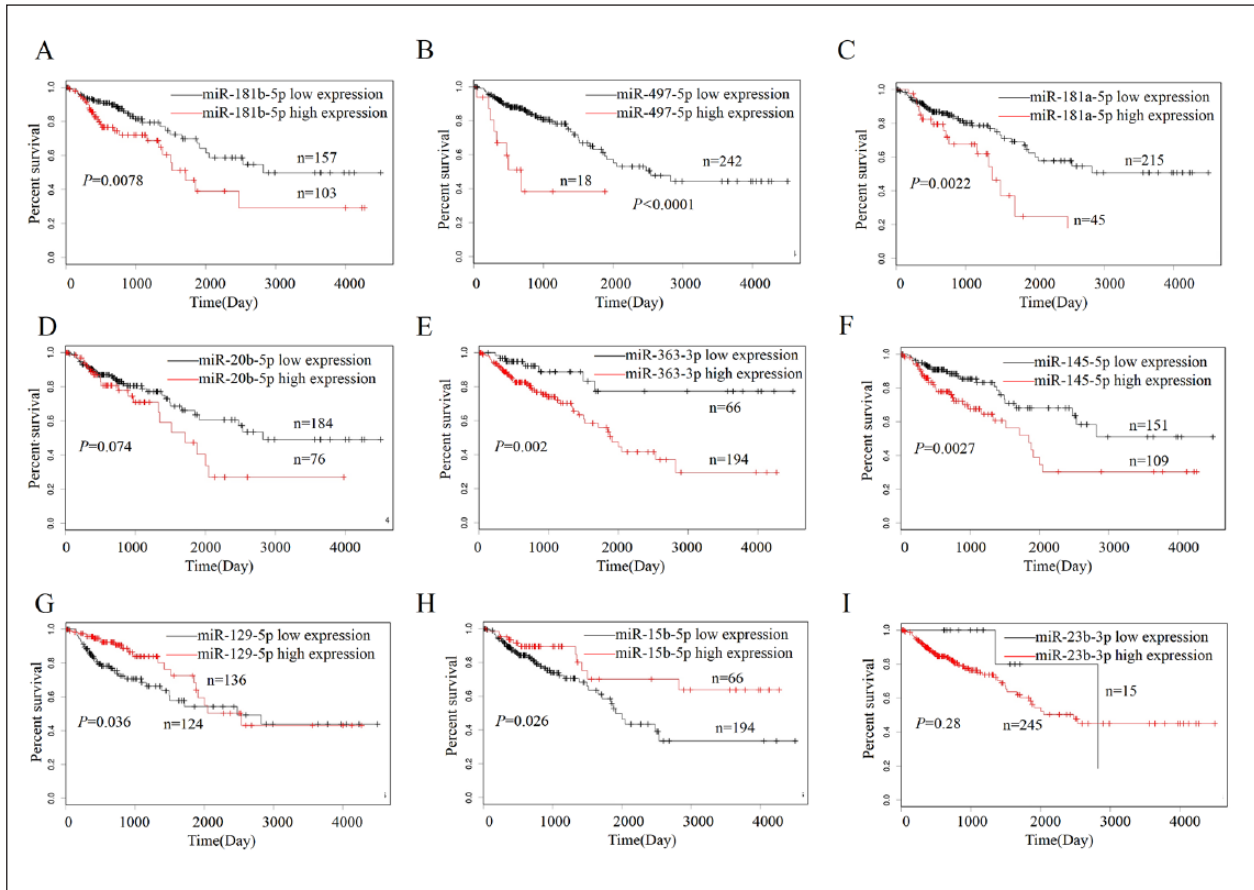

**Figure S5.** (A~I) Kaplan-Meier analysis of the association of other downregulated miRNAs with the OS in patients with COAD.

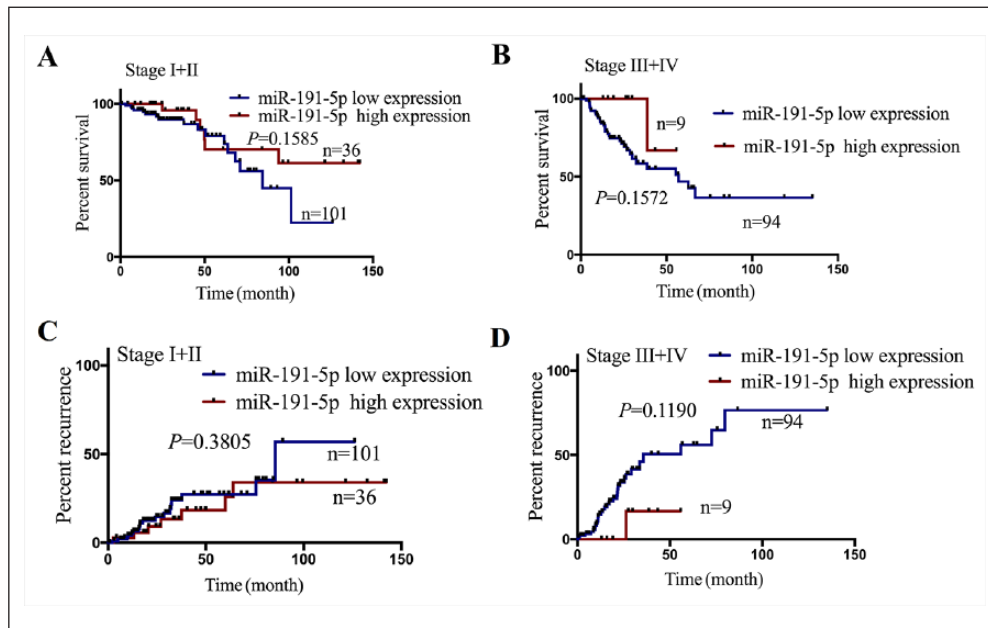

**Figure S6.** The association of miR-191-5p expression with the OS and tumor recurrence in COAD patients. (A and B) Kaplan-Meier plotter analysis of the correlation of miR-191-5p high or low expression with the tumor overall survival of COAD patients with stage I+II or stage III+IV. (C and D) Kaplan-Meier plotter analysis of the correlation of miR-191-5p high or low expression with the tumor recurrence of COAD patients with stage I+II or stage III+IV.

**Table S1.** The clinicopathological data of COAD patients in TCGA.

| Variables          | Case (n=240, 100%) |
|--------------------|--------------------|
| Age (years)        |                    |
| ≥ 60               | 86 (35.83%)        |
| < 60               | 154 (64.17%)       |
| Gender             |                    |
| Male               | 112 (46.67%)       |
| Female             | 128 (53.33%)       |
| Pathological stage |                    |
| I/II               | 137 (57.08%)       |
| III/IV             | 103 (42.92%)       |
| Lymphatic invasion |                    |
| No                 | 167 (69.58%)       |
| Yes                | 73 (30.42%)        |
| Histological type  |                    |
| CMA                | 33 (13.75%)        |
| CA                 | 207 (86.25%)       |

CMA: Colon Mucinous Adenocarcinoma, CA: Colon Adenocarcinoma.

**Table S2.** List of primers of the genes.

| Gene           | Forward primer                  | Reverse primer                |
|----------------|---------------------------------|-------------------------------|
| PD-L1          | 5'-CTGTAGCACTGACATTCATCTTCCG-3' | 5'-TGCCAATGCTGGATTACGTCTC-3'  |
| β-Actin        | 5'-GTGGCCGAGGACTTTGATTG-3'      | 5'-CCTGTAACAACGCATCTCATATT-3' |
| has-miR-191-5p | 5'-CAACGGAATCCCAAAAGCAGCTG-3'   | 5'-CAACGGAATCCCAAAAGCA -3'    |
| U6             | 5'-GCTTCGGCAGCACATATACTAAAAT-3' | 5'-CGCTTCACGAATTTGCGTGCAT-3'  |

**Table S3.** Cox regression analysis of PD-L1 as potential overall survival predictor.

| Variables          | Univariate Cox regression analysis |         | Multivariate Cox regression |         |
|--------------------|------------------------------------|---------|-----------------------------|---------|
|                    | RR (95% CI)                        | P value | RR (95% CI)                 | P value |
| Age(years)         |                                    |         |                             |         |
| ≤60 vs. >60        | 0.807 (0.604 to 1.077)             | 0.146   | NA                          | NA      |
| Gender             |                                    |         |                             |         |
| Male vs Female     | 0.600 (0.350 to 1.028)             | 0.060   | NA                          | NA      |
| pathologic stage   |                                    |         |                             |         |
| I+ II vs III+ IV   | 0.363 (0.212 to 0.619)             | < 0.001 | 0.480 (0.263 to 0.876)      | 0.017   |
| lymphatic invasion |                                    |         |                             |         |
| No vs Yes          | 0.478 (0.281 to 0.814)             | 0.007   | 0.715 (0.398 to 1.284)      | 0.262   |
| Histological type  |                                    |         |                             |         |
| CMA vs CA          | 0.826 (0.405 to 1.687)             | 0.600   | NA                          | NA      |
| PD-L1 expression   |                                    |         |                             |         |
| Low vs High        | 1.637 (1.095 to 2.446)             | 0.016   | 1.397 (0.923 to 2.113)      | 0.114   |

RR: relative risk, CMA: Colon Mucinous Adenocarcinoma, CA: Colon Adenocarcinoma.

**Table S4.** Cox regression analysis of miR-191-5p as potential tumor recurrence predictor.

| Variables             | Univariate Cox regression analysis |         | Multivariate Cox regression |         |
|-----------------------|------------------------------------|---------|-----------------------------|---------|
|                       | RR (95% CI)                        | P value | RR(95% CI)                  | P value |
| Age(years)            |                                    |         |                             |         |
| ≤60 vs. >60           | 1.414 (0.838 to 2.388)             | 0.195   | NA                          | NA      |
| Gender                |                                    |         |                             |         |
| Male vs Female        | 0.601 (0.350 to 1.031)             | 0.065   | NA                          | NA      |
| pathologic stage      |                                    |         |                             |         |
| I+ II vs III+ IV      | 0.398 (0.234 to 0.678)             | 0.001   | 0.628(0.340 to 1.160)       | 0.137   |
| lymphatic invasion    |                                    |         |                             |         |
| No vs Yes             | 0.355 (0.209 to 0.602)             | < 0.001 | 0.465(0.256 to 0.844)       | 0.012   |
| Histological type     |                                    |         |                             |         |
| CMA vs CA             | 0.966 (0.437 to 2.132)             | 0.932   | NA                          | NA      |
| PD-L1 expression      |                                    |         |                             |         |
| Low vs High           | 0.950(0.231 to 3.910)              | 0.943   | NA                          | NA      |
| miR-191-5p expression |                                    |         |                             |         |
| Low vs High           | 2.367 (1.112 to 5.037)             | 0.025   | 1.896(0.873 to 4.116)       | 0.106   |

RR: relative risk, CMA: Colon Mucinous Adenocarcinoma, CA: Colon Adenocarcinoma.
